# Supplementary material for: Green Waste from Cucumber (Cucumis sativus L.) Cultivation as a Source of Bioactive Flavonoids with Hypolipidemic Potential
Source: MDPI journal article supplement (doi:10.3390/agronomy13092410), 2023-09-18
Supplement: s1 [file s1]

# Green Waste from Cucumber (*Cucumis sativus* L.) Cultivation Is a Source of Bioactive Flavonoids with Hypolipidemic Potential

Daniil N. Olennikov \* and Nina I. Kashchenko

## Content

**Table S1.** Basic characteristics of six flavonoid-rich cucumber cultivars.

**Table S2.** Total flavonoid yield from cucumber leaves and stems in various extraction condition.

**Table S3.** Regression equation, correlation coefficient, standard deviation, limit of detection, limit of quantification, intra- and inter-day precision, repeatability, stability and recovery linear range for isovitexin in spectrophotometric assay.

**Table S4.** Mass-spectrometric (ESI-MS) data of compounds 1–38 found in flavonoid extracts of cucumber waste green biomass.

**Table S5.** Hypolipidemic and antioxidant activity of plant total flavonoid extracts.

**Figure S1.** Correlation graphs between flavonoid content in flavonoid extracts of cucumber waste green biomass and values of serum total cholesterol, serum total triglycerides, serum low-density lipoprotein-cholesterol, and serum high-density lipoprotein-cholesterol.

**Table S1.** Basic characteristics of six flavonoid-rich cucumber cultivars.

| Cultivar (supplier code <sup>a</sup> ) | Breeding Code <sup>b</sup> | Direction of Use | Ripening Period     | Type of Pollination | Crop Yield, kg/m <sup>2</sup> | Growing Conditions                     | Seasonal Green Biomass (Waste) Yield <sup>c</sup> , kg/m <sup>2</sup> |
|----------------------------------------|----------------------------|------------------|---------------------|---------------------|-------------------------------|----------------------------------------|-----------------------------------------------------------------------|
| Altai (A)                              | 7806183                    | Pickling         | Early (25–30 days)  | Bee-pollinated      | 3–4                           | Protected ground, commodity production | 10–15                                                                 |
| Konkurent (B)                          | 7605854                    | Pickling         | Early (25–30 days)  | Bee-pollinated      | 3–5                           | Protected ground, commodity production | 8–10                                                                  |
| Masha (C)                              | 9905332                    | Salad, canning   | Early (25–30 days)  | Parthenocarpic      | 10–11                         | Horticultural, commodity production    | 18–25                                                                 |
| Parizhskii Kornishon (D)               | 9609847                    | Salad, canning   | Early (30–32 days)  | Parthenocarpic      | 1–3                           | Horticultural, commodity production    | 5–8                                                                   |
| Zasolochnii (E)                        | 9900764                    | Pickling         | Middle (42–44 days) | Bee-pollinated      | 2–3                           | Protected ground, commodity production | 11–17                                                                 |
| Zozula (F)                             | 7306415                    | Salad            | Middle (46–48 days) | Parthenocarpic      | 15–25                         | Protected ground, commodity production | 18–22                                                                 |

<sup>a</sup> A—Federal Scientific Center of Vegetable Growing (Vniisok, Russia); B—Vavilov’s All-Russian Institute of Plant Genetic Resources (Saint Petersburg, Russia); C—Monsanto Holland BV (Amstelveen, Netherlands); D—Agrofirma Poisk, Ltd. (Vereya, Russia); E—Vavilov’s Volgograd Experimental Station (Krasnoslobodsk, Russia); F—Edelstein’s Vegetable Experimental Station (Moscow, Russia). <sup>b</sup> Breeding code is an original number assigned to the cultivars by State Commission for Testing and Protection of Breeding Achievements (Gossortkomissia). <sup>c</sup> Dry weight.

**Table S2.** Total flavonoid yield from cucumber leaves and stems (cv. Masha) in various extraction condition, mg/g DPW<sup>a</sup> ± S.D.

| Material                          | Extraction Parameter |              |              |              |              |              |
|-----------------------------------|----------------------|--------------|--------------|--------------|--------------|--------------|
|                                   | Solvent Type         |              |              |              |              |              |
|                                   | Water                | Methanol     | Ethanol      | Propanol     | Isopropanol  | Acetonitrile |
| Leaves                            | 26.93 ± 0.53         | 48.63 ± 0.97 | 49.63 ± 0.99 | 32.18 ± 0.64 | 25.83 ± 0.51 | 9.14 ± 0.18  |
| Stems                             | 0.93 ± 0.02          | 1.59 ± 0.03  | 1.83 ± 0.03  | 1.63 ± 0.03  | 0.69 ± 0.01  | 0.11 ± 0.00  |
| Ethanol Concentration, % of water |                      |              |              |              |              |              |
|                                   | 10                   | 30           | 50           | 70           | 90           |              |
| Leaves                            | 29.63 ± 0.59         | 32.84 ± 0.65 | 50.75 ± 1.02 | 51.89 ± 1.02 | 50.61 ± 1.00 |              |
| Stems                             | 1.14 ± 0.02          | 1.85 ± 0.03  | 2.03 ± 0.04  | 2.14 ± 0.04  | 1.95 ± 0.04  |              |
| Extraction Type <sup>b</sup>      |                      |              |              |              |              |              |
|                                   | USE                  | MWAE         | BWBE         | RTE          |              |              |
| Leaves                            | 51.09 ± 1.02         | 48.12 ± 0.96 | 45.14 ± 0.90 | 27.69 ± 0.55 |              |              |
| Stems                             | 2.10 ± 0.04          | 1.89 ± 0.03  | 1.53 ± 0.03  | 0.93 ± 0.02  |              |              |
| Extraction Duration, min          |                      |              |              |              |              |              |
|                                   | 10                   | 20           | 30           | 40           | 50           | 60           |
| Leaves                            | 21.14 ± 0.42         | 46.14 ± 0.92 | 52.11 ± 1.04 | 52.22 ± 1.04 | 52.79 ± 1.05 | 52.83 ± 1.05 |
| Stems                             | 1.20 ± 0.02          | 1.79 ± 0.03  | 2.17 ± 0.04  | 2.18 ± 0.04  | 2.18 ± 0.04  | 2.19 ± 0.04  |

<sup>a</sup>DPW—dry plant weight. <sup>b</sup>USE – ultrasound extraction (50°C), MWAE – microwave-assisted extraction (20°C), BWBE – boiled water bath extraction (95°C), RTE – room temperature extraction (20°C).

**Table S3.** Regression equation, correlation coefficient ( $r^2$ ), standard deviation ( $S_{yx}$ ), limit of detection (LOD), limit of quantification (LOQ), intra- and inter-day precision, repeatability, stability and recovery linear range for isovitexin in spectrophotometric assay.

| Regression equation                 | $r^2$                               | $S_{yx}$                      | LOD (µg/mL)               | LOQ (µg/mL)           | Linear range (µg/mL) |
|-------------------------------------|-------------------------------------|-------------------------------|---------------------------|-----------------------|----------------------|
| $y = 0.057 \cdot x - 0.001$         | 0.9999                              | $8.59 \cdot 10^{-3}$          | 0.46                      | 1.40                  | 2.0–500.0            |
| Precision intra-day (RSD%); $n = 5$ | Precision inter-day (RSD%); $n = 4$ | Repeatability (RSD%); $n = 7$ | Stability (RSD%); $n = 7$ | Recovery (%); $n = 5$ |                      |
| 1.12                                | 1.50                                | 1.45                          | 1.40                      | 99.32                 |                      |

**Table S4.** Mass-spectrometric (ESI-MS) data of compounds 1–38 found in flavonoid extracts of cucumber waste green biomass.

| No. | Compound                                                           | ESI-MS data, $m/z$ (Intensity, %)                                                                                                                                                                                                                                                                                |
|-----|--------------------------------------------------------------------|------------------------------------------------------------------------------------------------------------------------------------------------------------------------------------------------------------------------------------------------------------------------------------------------------------------|
| 1   | Cucumerin C                                                        | MS: 715 [M+H] <sup>+</sup> (35), 553 [(M+H)-162] <sup>+</sup> (100)<br>MS <sup>2</sup> [553]: 463 [(M+H)-162-90] <sup>+</sup> (70), 433 [(M+H)-162-120] <sup>+</sup> (100)                                                                                                                                       |
| 2   | Cucumerin D                                                        | MS: 715 [M+H] <sup>+</sup> (30), 553 [(M+H)-162] <sup>+</sup> (100)<br>MS <sup>2</sup> [553]: 463 [(M+H)-162-90] <sup>+</sup> (65), 433 [(M+H)-162-120] <sup>+</sup> (100)                                                                                                                                       |
| 3   | Cucumerin A/B O-pentoside                                          | MS: 685 [M+H] <sup>+</sup> (28), 553 [(M+H)-132] <sup>+</sup> (100)<br>MS <sup>2</sup> [553]: 463 [(M+H)-132-90] <sup>+</sup> (69), 433 [(M+H)-132-120] <sup>+</sup> (100)                                                                                                                                       |
| 4   | Apigenin-C-hexoside-tri-O-hexoside                                 | MS: 919 [M+H] <sup>+</sup> (14), 757 [(M+H)-162] <sup>+</sup> (3), 595 [(M+H)-162×2] <sup>+</sup> (12), 433 [(M+H)-162×3] <sup>+</sup> (100)<br>MS <sup>2</sup> [433]: 343 [(M+H)-162×3-90] <sup>+</sup> (70), 313 [(M+H)-162×3-120] <sup>+</sup> (100)                                                          |
| 5   | Isovitexin-7,4'-O-glucoside                                        | MS: 757 [M+H] <sup>+</sup> (10), 595 [(M+H)-162] <sup>+</sup> (7), 433 [(M+H)-162×2] <sup>+</sup> (100)<br>MS <sup>2</sup> [433]: 343 [(M+H)-162×2-90] <sup>+</sup> (71), 313 [(M+H)-162×2-120] <sup>+</sup> (100)                                                                                               |
| 6   | Cucumerin A/B O-desoxyhexoside                                     | MS: 699 [M+H] <sup>+</sup> (25), 553 [(M+H)-146] <sup>+</sup> (100)<br>MS <sup>2</sup> [553]: 463 [(M+H)-146-90] <sup>+</sup> (70), 433 [(M+H)-146-120] <sup>+</sup> (100)                                                                                                                                       |
| 7   | Isovitexin-4',2''-O-glucoside                                      | MS: 757 [M+H] <sup>+</sup> (14), 595 [(M+H)-162] <sup>+</sup> (1), 433 [(M+H)-162×2] <sup>+</sup> (100)<br>MS <sup>2</sup> [433]: 343 [(M+H)-162×2-90] <sup>+</sup> (68), 313 [(M+H)-162×2-120] <sup>+</sup> (100)                                                                                               |
| 8   | Cucumerin A/B O-desoxyhexoside                                     | MS: 699 [M+H] <sup>+</sup> (23), 553 [(M+H)-146] <sup>+</sup> (100)<br>MS <sup>2</sup> [553]: 463 [(M+H)-146-90] <sup>+</sup> (72), 433 [(M+H)-146-120] <sup>+</sup> (100)                                                                                                                                       |
| 9   | Apigenin-C-hexoside-di-O-hexoside-O-p-coumarate                    | MS: 903 [M+H] <sup>+</sup> (31), 757 [(M+H)-146] <sup>+</sup> (5), 595 [(M+H)-146-162] <sup>+</sup> (11), 433 [(M+H)-146-162×2] <sup>+</sup> (100)<br>MS <sup>2</sup> [433]: 343 [(M+H)-146-162×2-90] <sup>+</sup> (68), 313 [(M+H)-146-162×2-120] <sup>+</sup> (100)                                            |
| 10  | Isovitexin-7-O-(6''-O-glucosyl)-glucoside                          | MS: 757 [M+H] <sup>+</sup> (9), 595 [(M+H)-162] <sup>+</sup> (4), 433 [(M+H)-162×2] <sup>+</sup> (100)<br>MS <sup>2</sup> [433]: 343 [(M+H)-162×2-90] <sup>+</sup> (69), 313 [(M+H)-162×2-120] <sup>+</sup> (100)                                                                                                |
| 11  | Isovitexin-4'-O-glucoside-2''-O-(6'''-O-p-coumaroyl)-glucoside     | MS: 903 [M+H] <sup>+</sup> (12), 757 [(M+H)-146] <sup>+</sup> (5), 595 [(M+H)-146-162] <sup>+</sup> (2), 433 [(M+H)-146-162×2] <sup>+</sup> (100)<br>MS <sup>2</sup> [433]: 343 [(M+H)-146-162×2-90] <sup>+</sup> (69), 313 [(M+H)-146-162×2-120] <sup>+</sup> (100)                                             |
| 12  | Apigenin-C-hexoside-di-O-hexoside-O-ferulate                       | MS: 933 [M+H] <sup>+</sup> (18), 757 [(M+H)-176] <sup>+</sup> (7), 595 [(M+H)-176-162] <sup>+</sup> (5), 433 [(M+H)-176-162×2] <sup>+</sup> (100)<br>MS <sup>2</sup> [433]: 343 [(M+H)-176-162×2-90] <sup>+</sup> (70), 313 [(M+H)-176-162×2-120] <sup>+</sup> (100)                                             |
| 13  | Isovitexin-4'-O-glucoside-2''-O-(6'''-O-feruloyl)-glucoside        | MS: 933 [M+H] <sup>+</sup> (10), 757 [(M+H)-176] <sup>+</sup> (2), 595 [(M+H)-176-162] <sup>+</sup> (1), 433 [(M+H)-176-162×2] <sup>+</sup> (100)<br>MS <sup>2</sup> [433]: 343 [(M+H)-176-162×2-90] <sup>+</sup> (69), 313 [(M+H)-176-162×2-120] <sup>+</sup> (100)                                             |
| 14  | Apigenin-C-hexoside-di-O-hexoside-O-p-coumarate                    | MS: 903 [M+H] <sup>+</sup> (11), 757 [(M+H)-146] <sup>+</sup> (10), 595 [(M+H)-146-162] <sup>+</sup> (8), 433 [(M+H)-146-162×2] <sup>+</sup> (100)<br>MS <sup>2</sup> [433]: 343 [(M+H)-146-162×2-90] <sup>+</sup> (69), 313 [(M+H)-146-162×2-120] <sup>+</sup> (100)                                            |
| 15  | Isovitexin-2''-O-glucoside                                         | MS: 595 [M+H] <sup>+</sup> (15), 433 [(M+H)-162] <sup>+</sup> (100)<br>MS <sup>2</sup> [433]: 343 [(M+H)-162-90] <sup>+</sup> (70), 313 [(M+H)-162-120] <sup>+</sup> (100)                                                                                                                                       |
| 16  | Isovitexin-4'-O-glucoside                                          | MS: 595 [M+H] <sup>+</sup> (8), 433 [(M+H)-162] <sup>+</sup> (100)<br>MS <sup>2</sup> [433]: 343 [(M+H)-162-90] <sup>+</sup> (71), 313 [(M+H)-162-120] <sup>+</sup> (100)                                                                                                                                        |
| 17  | Apigenin-C-hexoside-di-O-hexoside-O-ferulate                       | MS: 933 [M+H] <sup>+</sup> (14), 757 [(M+H)-176] <sup>+</sup> (11), 595 [(M+H)-176-162] <sup>+</sup> (2), 433 [(M+H)-176-162×2] <sup>+</sup> (100)<br>MS <sup>2</sup> [433]: 343 [(M+H)-176-162×2-90] <sup>+</sup> (71), 313 [(M+H)-176-162×2-120] <sup>+</sup> (100)                                            |
| 18  | Apigenin-C-hexoside-di-O-hexoside-O-p-coumarate                    | MS: 903 [M+H] <sup>+</sup> (16), 757 [(M+H)-146] <sup>+</sup> (5), 595 [(M+H)-146-162] <sup>+</sup> (4), 433 [(M+H)-146-162×2] <sup>+</sup> (100)<br>MS <sup>2</sup> [433]: 343 [(M+H)-146-162×2-90] <sup>+</sup> (69), 313 [(M+H)-146-162×2-120] <sup>+</sup> (100)                                             |
| 19  | Apigenin-7-O-(6''-O-feruloyl)-glucoside (saponarin-6''-O-ferulate) | MS: 609 [M+H] <sup>+</sup> (25), 433 [(M+H)-176] <sup>+</sup> (39), 271 [(M+H)-176-162] <sup>+</sup> (100)<br>MS <sup>2</sup> [271]: 153 [(M+H)-176-162-118] <sup>+</sup> (100), 145 [(M+H)-176-162-126] <sup>+</sup> (29), 121 [(M+H)-176-162-150] <sup>+</sup> (16), 119 [(M+H)-176-162-152] <sup>+</sup> (30) |

|    |                                                             |                                                                                                                                                                                                                                                                     |
|----|-------------------------------------------------------------|---------------------------------------------------------------------------------------------------------------------------------------------------------------------------------------------------------------------------------------------------------------------|
| 20 | Isovitexin-2''-O-(6'''-O- <i>p</i> -coumaroyl)-glucoside    | MS: 741 [M+H] <sup>+</sup> (20), 595 [(M+H)-146] <sup>+</sup> (17), 433 [(M+H)-146-162] <sup>+</sup> (100)<br>MS <sup>2</sup> [433]: 343 [(M+H)-162-90] <sup>+</sup> (70), 313 [(M+H)-162-120] <sup>+</sup> (100)                                                   |
| 21 | Isovitexin-2''-O-glucoside-6''-O- <i>p</i> -coumarate       | MS: 741 [M+H] <sup>+</sup> (10), 595 [(M+H)-146] <sup>+</sup> (2), 433 [(M+H)-146-162] <sup>+</sup> (100)<br>MS <sup>2</sup> [433]: 343 [(M+H)-146-162-90] <sup>+</sup> (67), 313 [(M+H)-146-162-120] <sup>+</sup> (100)                                            |
| 22 | Isovitexin-2''-O-glucoside-6''-O-ferulate                   | MS: 771 [M+H] <sup>+</sup> (9), 595 [(M+H)-176] <sup>+</sup> (1), 433 [(M+H)-176-162] <sup>+</sup> (100)<br>MS <sup>2</sup> [433]: 343 [(M+H)-176-162-90] <sup>+</sup> (68), 313 [(M+H)-176-162-120] <sup>+</sup> (100)                                             |
| 23 | Apigenin-C-hexoside-O-hexoside-O- <i>p</i> -coumarate       | MS: 741 [M+H] <sup>+</sup> (12), 595 [(M+H)-146] <sup>+</sup> (3), 433 [(M+H)-146-162] <sup>+</sup> (100)<br>MS <sup>2</sup> [433]: 343 [(M+H)-146-162-90] <sup>+</sup> (68), 313 [(M+H)-146-162-120] <sup>+</sup> (100)                                            |
| 24 | Isovitexin-2''-O-(6'''-O-feruloyl)-glucoside                | MS: 771 [M+H] <sup>+</sup> (14), 595 [(M+H)-176] <sup>+</sup> (8), 433 [(M+H)-176-162] <sup>+</sup> (100)<br>MS <sup>2</sup> [433]: 343 [(M+H)-176-162-90] <sup>+</sup> (69), 313 [(M+H)-176-162-120] <sup>+</sup> (100)                                            |
| 25 | Isovitexin-2''-O- <i>p</i> -coumarate                       | MS: 579 [M+H] <sup>+</sup> (16), 433 [(M+H)-146] <sup>+</sup> (100)<br>MS <sup>2</sup> [433]: 343 [(M+H)-146-90] <sup>+</sup> (72), 313 [(M+H)-146-120] <sup>+</sup> (100)                                                                                          |
| 26 | Cucumerin C/D O-hexoside                                    | MS: 877 [M+H] <sup>+</sup> (41), 715 [(M+H)-162] <sup>+</sup> (30), 553 [(M+H)-162×2] <sup>+</sup> (100)<br>MS <sup>2</sup> [553]: 463 [(M+H)-162×2-90] <sup>+</sup> (67), 433 [(M+H)-162×2-120] <sup>+</sup> (100)                                                 |
| 27 | Cucumerin C/D O-hexoside                                    | MS: 877 [M+H] <sup>+</sup> (45), 715 [(M+H)-162] <sup>+</sup> (25), 553 [(M+H)-162×2] <sup>+</sup> (100)<br>MS <sup>2</sup> [553]: 463 [(M+H)-162×2-90] <sup>+</sup> (69), 433 [(M+H)-162×2-120] <sup>+</sup> (100)                                                 |
| 28 | Isovitexin-7-O-glucoside                                    | MS: 595 [M+H] <sup>+</sup> (10), 433 [(M+H)-162] <sup>+</sup> (100)<br>MS <sup>2</sup> [433]: 343 [(M+H)-162-90] <sup>+</sup> (70), 313 [(M+H)-162-120] <sup>+</sup> (100)                                                                                          |
| 29 | Apigenin-C-hexoside-O-hexoside-O- <i>p</i> -coumarate       | MS: 741 [M+H] <sup>+</sup> (12), 595 [(M+H)-146] <sup>+</sup> (1), 433 [(M+H)-146-162] <sup>+</sup> (100)<br>MS <sup>2</sup> [433]: 343 [(M+H)-146-162-90] <sup>+</sup> (68), 313 [(M+H)-146-162-120] <sup>+</sup> (100)                                            |
| 30 | Apigenin-C-hexoside-O-hexoside-O- <i>p</i> -coumarate       | MS: 741 [M+H] <sup>+</sup> (16), 595 [(M+H)-146] <sup>+</sup> (4), 433 [(M+H)-146-162] <sup>+</sup> (100)<br>MS <sup>2</sup> [433]: 343 [(M+H)-146-162-90] <sup>+</sup> (68), 313 [(M+H)-146-162-120] <sup>+</sup> (100)                                            |
| 31 | Apigenin-C-hexoside-O-hexoside-O- <i>p</i> -coumarate       | MS: 741 [M+H] <sup>+</sup> (11), 595 [(M+H)-146] <sup>+</sup> (4), 433 [(M+H)-146-162] <sup>+</sup> (100)<br>MS <sup>2</sup> [433]: 343 [(M+H)-146-162-90] <sup>+</sup> (67), 313 [(M+H)-146-162-120] <sup>+</sup> (100)                                            |
| 32 | Isovitexin-2''-O-rhamnoside                                 | MS: 579 [M+H] <sup>+</sup> (18), 433 [(M+H)-146] <sup>+</sup> (100)<br>MS <sup>2</sup> [433]: 343 [(M+H)-146-90] <sup>+</sup> (70), 313 [(M+H)-146-120] <sup>+</sup> (100)                                                                                          |
| 33 | Isovitexin                                                  | MS: 433 [M+H] <sup>+</sup> (100), 343 [(M+H)-90] <sup>+</sup> (35), 313 [(M+H)-120] <sup>+</sup> (31)                                                                                                                                                               |
| 34 | Isovitexin-2''-O-(6'''-O-feruloyl)-glucoside-6''-O-ferulate | MS: 947 [M+H] <sup>+</sup> (25), 771 [(M+H)-176] <sup>+</sup> (10), 595 [(M+H)-176×2] <sup>+</sup> (3), 433 [(M+H)-176×2-162] <sup>+</sup> (100)<br>MS <sup>2</sup> [433]: 343 [(M+H)-176×2-162-90] <sup>+</sup> (69), 313 [(M+H)-176×2-162-120] <sup>+</sup> (100) |
| 35 | Isovitexin-6''-O- <i>p</i> -coumarate                       | MS: 579 [M+H] <sup>+</sup> (17), 433 [(M+H)-146] <sup>+</sup> (100)<br>MS <sup>2</sup> [433]: 343 [(M+H)-146-90] <sup>+</sup> (70), 313 [(M+H)-146-120] <sup>+</sup> (100)                                                                                          |
| 36 | Apigenin-C-hexoside-di-O- <i>p</i> -coumarate               | MS: 725 [M+H] <sup>+</sup> (8), 579 [(M+H)-146] <sup>+</sup> (2), 433 [(M+H)-146×2] <sup>+</sup> (100)<br>MS <sup>2</sup> [433]: 343 [(M+H)-146×2-90] <sup>+</sup> (65), 313 [(M+H)-146×2-120] <sup>+</sup> (100)                                                   |
| 37 | Apigenin-C-hexoside-O- <i>p</i> -coumarate-O-ferulate       | MS: 755 [M+H] <sup>+</sup> (12), 609 [(M+H)-146] <sup>+</sup> (1), 579 [(M+H)-176] <sup>+</sup> (1), 433 [(M+H)-146-176] <sup>+</sup> (100)<br>MS <sup>2</sup> [433]: 343 [(M+H)-146-176-90] <sup>+</sup> (68), 313 [(M+H)-146-176-120] <sup>+</sup> (100)          |
| 38 | Apigenin-C-hexoside-di-O-ferulate                           | MS: 785 [M+H] <sup>+</sup> (18), 609 [(M+H)-176] <sup>+</sup> (7), 433 [(M+H)-176×2] <sup>+</sup> (100)<br>MS <sup>2</sup> [433]: 343 [(M+H)-176×2-90] <sup>+</sup> (69), 313 [(M+H)-176×2-120] <sup>+</sup> (100)                                                  |

**Table S5.** Hypolipidemic and antioxidant activity of plant total flavonoid extracts.

| Source                                        | Model                                                                 | Hypolipidemic Manifestation  | Antioxidant Manifestation          |
|-----------------------------------------------|-----------------------------------------------------------------------|------------------------------|------------------------------------|
| <i>Actinidia kolomikta</i> leaves [63]        | Mice hyperlipidemia; lard-based high fat diet; 3 weeks                | Serum TC↓, TG↓, LDLC↓, HDLC↑ | Liver SOD↑, GPx↑, CAT↑, serum MDA↓ |
| <i>Chrysanthemum morifolium</i> flowers [53]  | Rat hyperlipidemia; lard-based high fat diet; 6 weeks                 | Serum TC↓, TG↓, LDLC↓, HDLC↑ | Liver SOD↑, GPx↑, CAT↑, serum MDA↓ |
| <i>Citrus aurantium</i> pericarp [64]         | Golden hamster hyperlipidemia; 2% cholesterol high fat diet; 6 weeks  | Serum TC↓, TG↓, LDLC↓, HDLC↑ | Liver SOD↑, serum MDA↓             |
| <i>Crataegus pinnatifida</i> leaves [55]      | Rat hyperlipidemia; 1.2% cholesterol high fat diet; 6 weeks           | Serum TC↓, TG↓, LDLC↓, HDLC↑ | Liver SOD↑, GPx↑, CAT↑             |
| <i>Cucumis sativus</i> leaves (present study) | Golden hamster hyperlipidemia; 1% cholesterol high fat diet; 6 months | Serum TC↓, TG↓, LDLC↓, HDLC↑ | Liver SOD↑, GPx↑, CAT↑, serum MDA↓ |
| <i>Polygonum capitatum</i> herb [65]          | Rat hyperlipidemia; high fat diet; 6 weeks                            | Serum TC↓, TG↓, LDLC↓, HDLC↑ | Liver SOD↑, GPx↑, CAT↑, serum MDA↓ |
| <i>Polygonum perfoliatum</i> tubers [66]      | Rat hyperlipidemia; 3% cholesterol high fat diet; 6 weeks             | Serum TC↓, TG↓, LDLC↓, HDLC↑ | Liver SOD↑, GPx↑, CAT↑, serum MDA↓ |
| <i>Solanum melongena</i> fruits [48]          | Rat hyperlipidemia; 2% cholesterol high fat diet; 45 days             | Serum TC↓, TG↓               | -                                  |
| <i>Trichosanthes kirilowii</i> seeds [67]     | Mice hyperlipidemia; lard-based high fat diet; 6 weeks                | Serum TC↓, TG↓, LDLC↓        | Liver SOD↑, GPx↑, serum MDA↓       |

CAT—liver catalase; GPx—liver glutathione peroxidase; HDLC—serum high-density lipoprotein-cholesterol; LDLC—serum low-density lipoprotein-cholesterol; MDA—serum malondialdehyde level; SOD—liver superoxide dismutase; TC—total cholesterol (TC); TG—serum total triglycerides; ↓—level decreased; ↑—level increased.

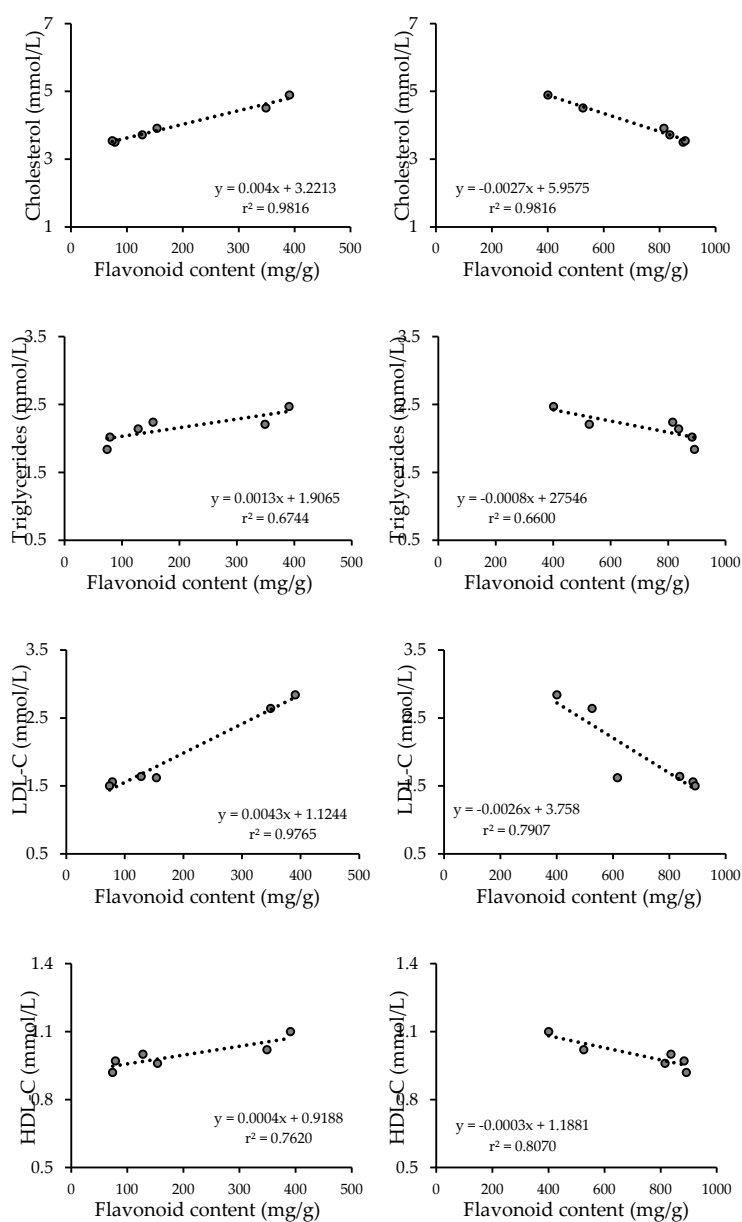

**Figure S1.** Correlation graphs between flavonoid content in flavonoid extracts of cucumber waste green biomass (mg/g) and values of serum total cholesterol, serum total triglycerides, serum low-density lipoprotein-cholesterol (LDL-C), and serum high-density lipoprotein-cholesterol (HDL-C).
